# Supplementary material for: Folic acid on iron oxide nanoparticles: platform with high potential for simultaneous targeting, MRI detection and hyperthermia treatment of lymph node metastases of prostate cancer
Source: Royal Society of Chemistry journal article supplement (doi:10.1039/c7dt02139a), 2017-01-01
Supplement: c7dt02139a1.pdf [file c7dt02139a1.pdf]

## Supporting Information

### Folic acid on iron oxide nanoparticles: platform with high potential for simultaneous targeting, MRI detection and hyperthermia treatment of lymph node metastases of prostate cancer

Debora Bonvin,<sup>a</sup> Jessica A.M. Bastiaansen,<sup>b,c</sup> Matthias Stuber,<sup>b,c</sup> Heinrich Hofmann,<sup>a</sup> and Marijana Mionić Ebersold<sup>a,b,c\*</sup>

<sup>a</sup>Powder Technology Laboratory, Institute of Materials, Ecole polytechnique fédérale de Lausanne, Switzerland.

<sup>b</sup>Department of Radiology, University Hospital (CHUV) and University of Lausanne (UNIL), Switzerland. E-mail: marijanamionic@gmail.com.

<sup>c</sup>Center of Biomedical Imaging (CIBM), Lausanne, Switzerland

#### Supporting Experimental Section

**MRI.** Imaging parameters for longitudinal relaxation times  $T_1$ : TR 12 s, TE 7.5 ms, slice thickness 3 mm, FOV 130 x 220 mm<sup>2</sup>, matrix 266 x 448, RF excitation angle 90°, receiver bandwidth of 655 Hz/pixel, TI 23, 50, 75, 100, 125, 150, 250, 500, 1000, 5000, 10000 ms. Imaging parameters for transversal relaxation times  $T_2$ : TR 15 s, TE 7.5, 8.5, 10, 15, 20, 25, 30, 50, 100, 150, 400 ms, slice thickness 3 mm, FOV 130 x 220 mm<sup>2</sup>, matrix 266 x 448, RF excitation angle 90°, receiver bandwidth of 655 Hz/pixel. The MRI signals of each suspension were determined using Image J and signal evolutions were analysed and fitted using Matlab (The MathWorks, Natick, MA, USA). The signal evolution  $S$  as function of TI and TE was fitted to derive the  $T_1$  and  $T_2$  of each  $\gamma$ -Fe<sub>2</sub>O<sub>3</sub> nanoparticle suspension respectively, and is described as follows:

$$(1) \quad S(TE) = S(0)e^{-\frac{TE}{T_2}} + C,$$

$$(2) \quad S(TI) = S(0)(1 - 2e^{-\frac{TI}{T_1}}).$$

The  $T_1$  and  $T_2$  values as function of their  $\gamma$ -Fe<sub>2</sub>O<sub>3</sub> nanoparticles concentration were subsequently fitted to obtain the relaxivities  $r_1$  and  $r_2$  described as:

$$(3) \quad \frac{1}{T_{1,2}} = \frac{1}{T_{1,2}[0]} + r_{1,2}[\gamma - \text{Fe}_2\text{O}_3].$$

**Cell culture.** RWPE-1 cells were cultured in K-SFM containing human recombinant epidermal growth factor 1-53 and bovine pituitary extract (Gibco) supplemented with 1.5 % 10'000 U ml<sup>-1</sup> Penicillin Streptomycin (Life Technologies); 22Rv1 and LnCaP cells were cultured in RPMI 1640 medium (ATCC) and PC3 cells in DMEM GlutaMAX with 25 mM high glucose and 1 mM sodium pyruvate (Gibco), all supplemented with 10 % fetal bovine serum (Life Technologies) and 1.5 % 10'000 U ml<sup>-1</sup> Penicillin Streptomycin.

**In vitro toxicity study.** The cell viability was assessed with the MTS test, as well as with APC-Annexin V and propidium iodide (PI). For the MTS test, 40'000 LnCaP or 15'000 RWPE-1 cells

per well were cultured in 96-well plates at 37 °C, and exposed to 100 µl of different concentrations of IONPs (0, 1, 5, 10, 50 and 100 µg<sub>Fe</sub> ml<sup>-1</sup>) for 1 h, 6 h and 24 h. Cells treated only with medium served as negative controls. After 24 h incubation, the supernatant of each well were removed. 100 µl of MTS solution (CellTiter 96® AQueous One Solution Cell Proliferation Assay from Promega, diluted 6 times in medium) was added to the cells. After 2 h incubation, the absorbance of the formazan product was measured with a microplate reader (Tecan Infinite M200) at a wavelength of 490 nm. For the Annexin V/PI assay, 600'000 22Rv.1, 350'000 LnCaP cells and 200'000 PC3 cells per well were cultured in 6 well plates, and exposed to 2.5 ml of different IONPs' concentrations (0, 5, 10, 50 and 100 µg<sub>Fe</sub> ml<sup>-1</sup>) for 24 h. Cells treated only with medium served as negative controls, and cells treated with 10 µM of staurosporine (diluted from 1 mM solution in DMSO, Sigma-Aldrich) for 20 h and 2 mM H<sub>2</sub>O<sub>2</sub> (diluted from 3 % stock solution, Fluka) for 4 h were used as positive controls. After 24 h incubation, cells were washed once with PBS and detached from the wells with 0.05 % trypsin-EDTA. Cells were centrifuged and resuspended in 100 µl of Annexin V Binding Buffer (BioLegend). 12.5 µl of 1/25 APC-Annexin V solution (BioLegend) were added to the cells, which were incubated for 25 min at room temperature in the dark. 5 µl of PI and 100 µl of Annexin V Binding Buffer were then added. Samples were analyzed by flow cytometry (Accuri C6). APC-Annexin V was detected with  $\lambda_{exc} = 640$  nm and  $\lambda_{em} = 675 \pm 12.5$  nm and PI was detected with  $\lambda_{exc} = 488$  nm and  $\lambda_{em} = 585 \pm 20$  nm. The cell viabilities are reported as cells negative for both Annexin V and PI. For both the MTS test and the Annexin V/PI assay, all experiments were performed in triplicates. Results are given as means (with standard deviations) of the values obtained in these triplicates.

***In vitro* hyperthermia.** 300'000 22Rv.1, 70'000 LnCaP and 60'000 PC3 cells were suspended in 1 ml of growth medium and transferred into cryogenic vials (Thermo Scientific Nalgene). Cells were placed in a water bath at 44°C for 20 min or 40 min. Untreated cells, which served as negative controls, were placed in the incubator at 37°C for 20 min or 40 min. The cell viability was assessed (i) right after the heat treatment, and (ii) 15 h after the heat treatment, where cells were transferred in a 24 well plate and detached from the wells with 0.05 % trypsin-EDTA 15 h later. For both time points, cells were stained with Annexin V and PI, as described for the *in vitro* toxicity study, and analyzed by flow cytometry (Accuri C6).

**Cellular uptake study after receptor blocking with FA.** 200'000 22Rv.1 and 40'000 LnCaP cells per well were cultured in 12 well plates for the Prussian Blue staining. 600'000 22Rv.1 and 350'000 LnCaP cells per well were cultured in 6 well plates for the flow cytometry analysis. After 24 h, cells were exposed to 40 µM of FA for 15 min. After 15 min, cells were exposed to 1 ml of 100 µg<sub>Fe</sub> ml<sup>-1</sup> of FA-IONPs for 24 h. After 24 h, cells were stained with Prussian Blue as described in the main manuscript in the *cellular uptake study* section. The uptake of FA-IONPs was also evaluated by flow cytometry as described in the *in vitro toxicity study* section.

***In vitro* MRI in cells (MRI of cells incubated with FA-IONPs).** We performed two different MRI:



1) 600'000 22Rv.1 per well were cultured in 6 well plates. Two wells per concentration were plated. After 24 h, cells were exposed to 2.5 ml of different concentrations of FA-IONPs (0, 10, 50 and 100  $\mu\text{g}_{\text{Fe}} \text{ml}^{-1}$ ) for 24 h. After 24 h, cells were washed with PBS and detached with 0.05 % trypsin-EDTA. Cells from two wells, which were incubated with the same concentration of FA-IONPs were put together in the same tube and centrifuged. The cell pellets were resuspended in 100  $\mu\text{l}$  of 2 % agar. 1.5 ml eppendorf tubes were first filled with 600  $\mu\text{l}$  of 2 % agar, then with the cell-aggar suspensions and finally with 1 ml of 2 % agar. 1.5 ml eppendorf tubes with only 2 % agar were used as controls.

**MRI of 22Rv.1 cells.** Imaging parameters for longitudinal relaxation times  $T_1$ : TR 12 s, TE 7.1 ms, slice thickness 5 mm, FOV 220 x 55  $\text{mm}^2$ , matrix 384 x 96, RF excitation angle 90°, receiver bandwidth of 650 Hz/pixel, TI 23, 50, 75, 100, 125, 150, 250, 500, 1000, 5000, 10000 ms. Imaging parameters for transversal relaxation times  $T_2$ : TR 12 s, TE 7.1, 8.5, 10, 15, 20, 25, 30, 50, 100, 150, 400 ms, slice thickness 5 mm, FOV 220 x 55  $\text{mm}^2$ , matrix 384 x 96, RF excitation angle 90°, receiver bandwidth of 655 Hz/pixel.

2) 350'000 LnCaP per well were cultured in 6 well plates. After 24 h, cells were exposed to 2.5 ml of different concentrations of FA-IONPs (0, 0.01 and 0.1  $\mu\text{g}_{\text{Fe}} \text{ml}^{-1}$ ) for 24 h. After 24 h, cells were washed with PBS, detached with 0.05 % trypsin-EDTA and centrifuged. The cell pellets were resuspended in 50  $\mu\text{l}$  of 2 % agar and transferred in 0.5 ml eppendorf tubes. The remaining empty space in the tubes was filled with 2 % agar. 0.5 ml eppendorf tubes filled with only 2 % agar were used as controls.

**MRI of LnCaP cells.** Imaging parameters for longitudinal relaxation times  $T_1$ : TR 12 s, TE 7.5 ms, slice thickness 3 mm, FOV 130 x 220  $\text{mm}^2$ , matrix 266 x 448, RF excitation angle 90°, receiver bandwidth of 655 Hz/pixel, TI 23, 50, 75, 100, 125, 150, 250, 500, 1000, 5000, 10000 ms. Imaging parameters for transversal relaxation times  $T_2$ : TR 15 s, TE 7.5, 8.5, 10, 15, 20, 25, 30, 50, 100, 150, 400 ms, slice thickness 3 mm, FOV 130 x 220  $\text{mm}^2$ , matrix 266 x 448, RF excitation angle 90°, receiver bandwidth of 655 Hz/pixel.

## Supporting Figures and Tables

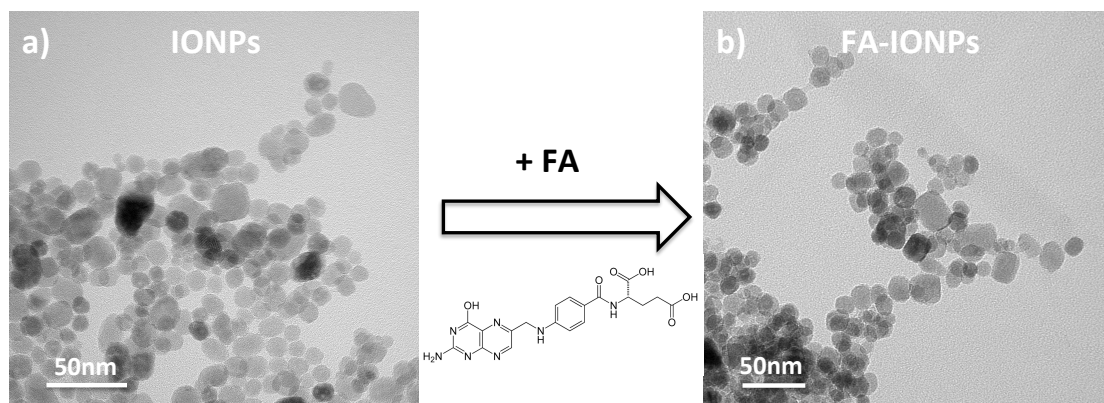

**Fig. S1:** Representative TEM micrographs of uncoated IONPs (a) and FA-IONPs (b). The chemical structure of FA is given in the center of the figure.

**Table S1:** Atomic percentages of Fe, O, C and N obtained by XPS in uncoated IONPs and FA-IONPs.

| Atomic %      | Fe 2p | O 1s | C 1s | N 1s |
|---------------|-------|------|------|------|
| IONPs         | 32.0  | 50.6 | 17.3 | -    |
| PLP-IONPs-pH7 | 10.3  | 28.7 | 48.0 | 13.1 |

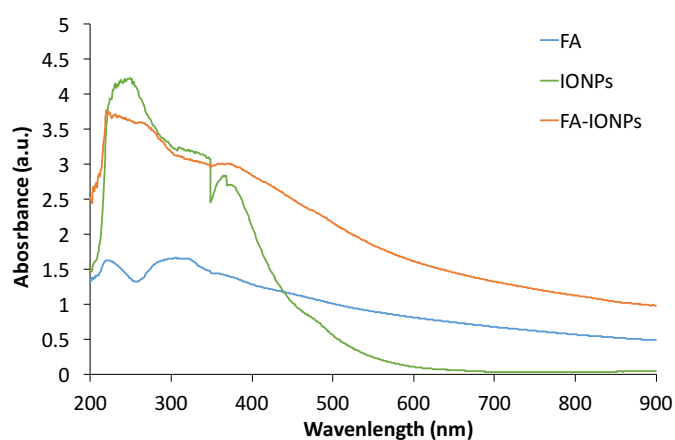

**Fig. S2:** Absorbance of FA, IONPs and FA-IONPs measured by UV-visible spectroscopy.

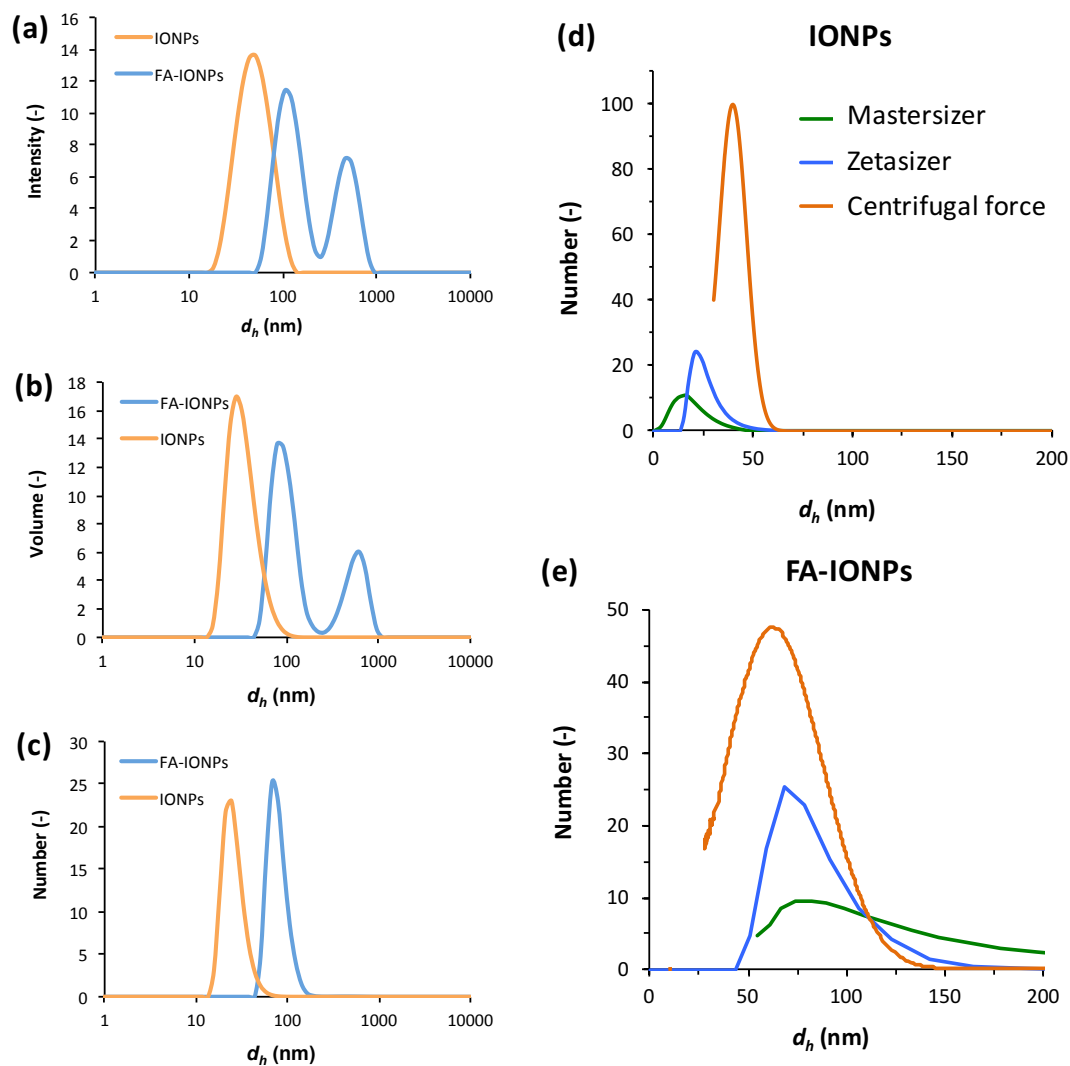

**Fig. S3:** (a-c) Distribution of the hydrodynamic diameter,  $d_h$ , of IONPs and FA-IONPs given in intensity (a), volume (b) and number (c) measured by DLS with the Zetasizer. (d-e) Number weighted distribution of the hydrodynamic diameter,  $d_h$ , of IONPs (d) and FA-IONPs (e) measured in H<sub>2</sub>O (pH ~6) by dynamic light scattering (DLS) with the Mastersizer (Malvern Instruments) or with the Zetasizer (Malvern Instruments), or by centrifugal force (CPS Instruments).

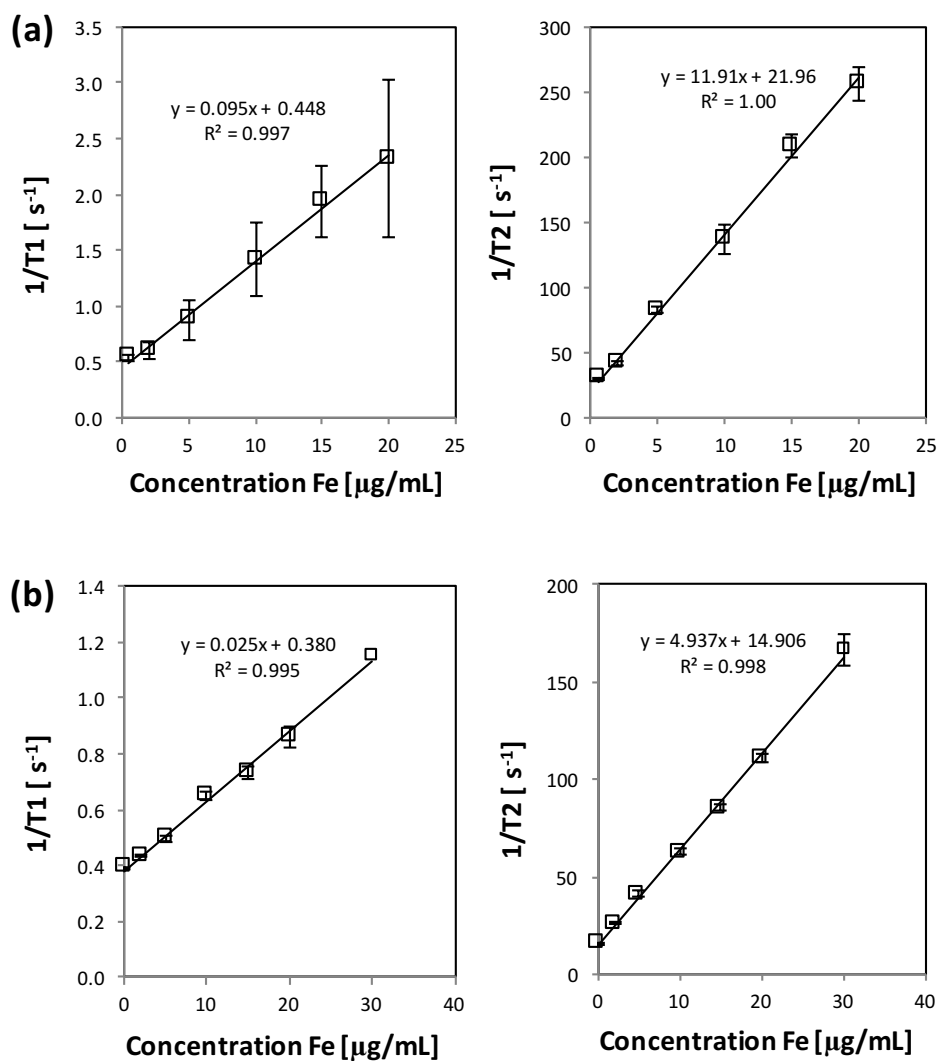

**Fig. S4:**  $1/T1$  and  $1/T2$  as a function of the Fe concentration measured at 3 T for uncoated IONPs and FA-IONPs.

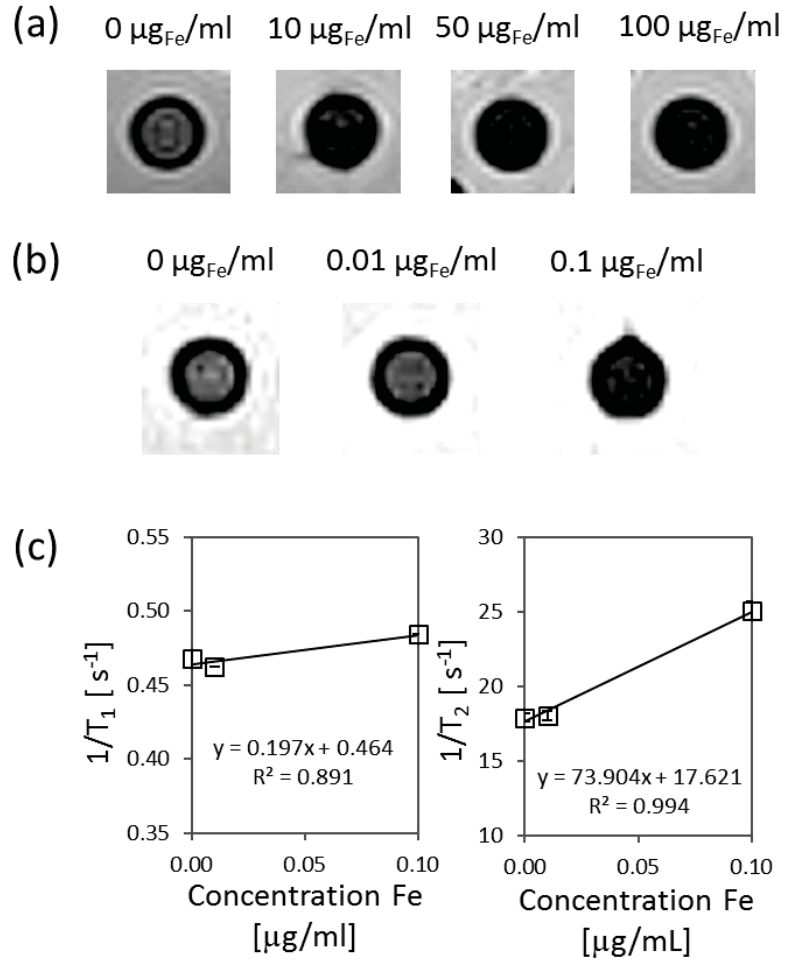

**Fig. S5:** (a) MR images of 22Rv.1 cells after incubation for 24h without ( $0 \mu\text{g}_{\text{Fe}}/\text{ml}$ ) and with FA-IONPs at concentrations of 10, 50 and  $100 \mu\text{g}_{\text{Fe}}/\text{ml}$ . (b) MR images of LnCaP cells after incubation for 24h without ( $0 \mu\text{g}_{\text{Fe}}/\text{ml}$ ) and with FA-IONPs at concentrations of 0.01 and  $0.1 \mu\text{g}_{\text{Fe}}/\text{ml}$ . (c)  $1/T_1$  and  $1/T_2$  as a function of the Fe concentration measured at 3 T in LnCaP cells after 24h incubation without ( $0 \mu\text{g}_{\text{Fe}}/\text{ml}$ ) and with FA-IONPs at concentrations of 0.01 and  $0.1 \mu\text{g}_{\text{Fe}}/\text{ml}$ .

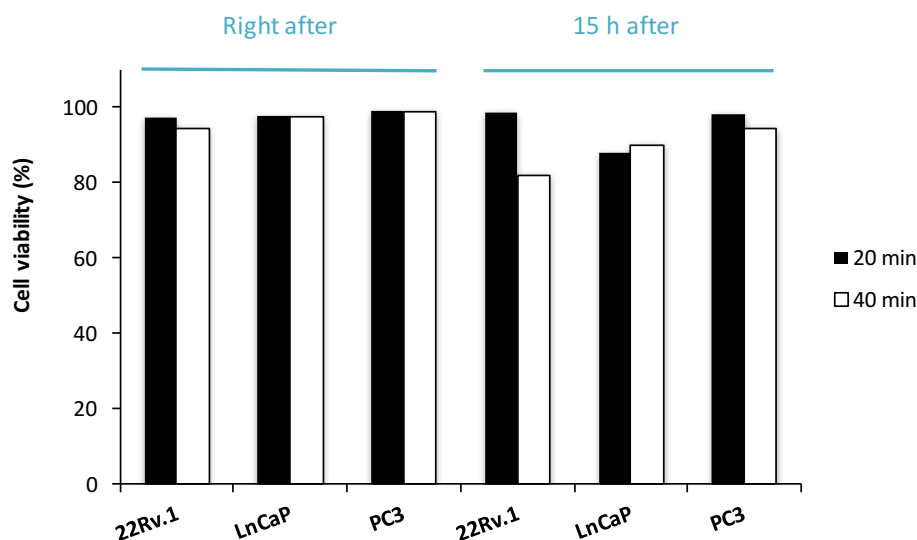

**Fig. S6:** Viability of 22Rv.1, LnCaP and PC3 cells treated for 20 min or 40 min at 44°C in a water bath. The cell viability was measured with the Annexin V/PI assay right after or 15 h after the heat treatment. The cell viabilities are the number of viable cells (negative for both Annexin V and PI), which were subjected to heat, normalized with the number of viable cells without heat treatment.

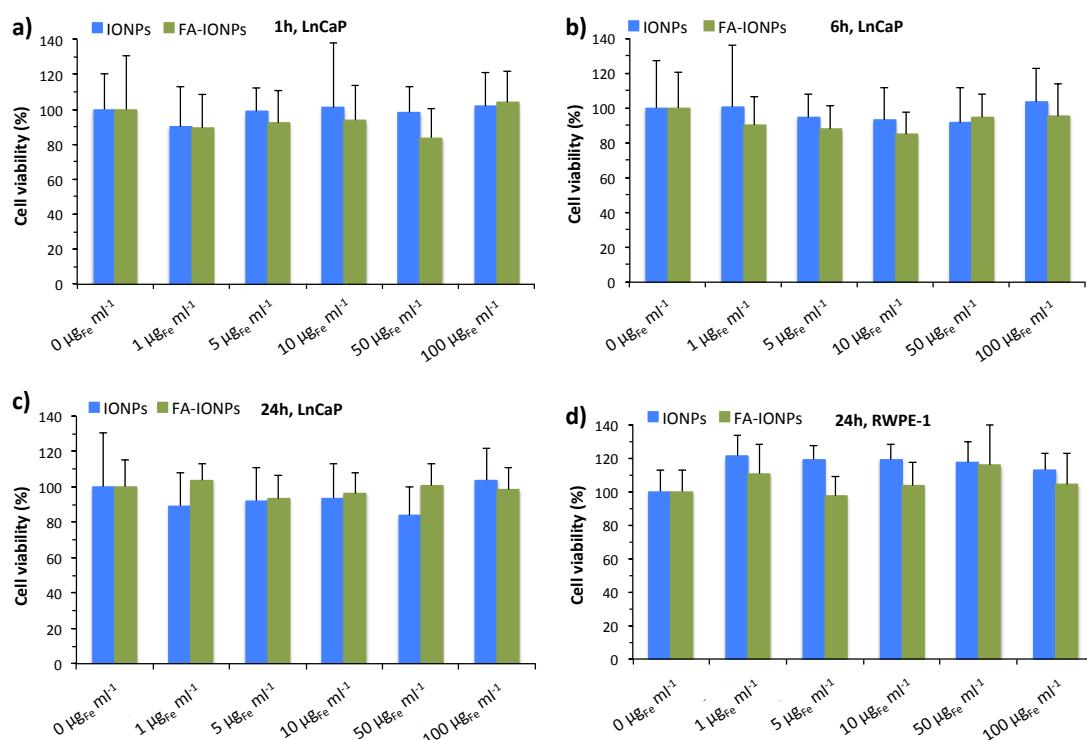

**Fig. S7:** Viability of LnCaP (a, b and c) and RWPE-1 (d) cells incubated for 1 h (a), 6 h (b) and 24 h (c, d) with different concentrations (0, 1, 5, 10, 50 and 100  $\mu\text{g}_{\text{Fe}} \text{ml}^{-1}$ ) of uncoated IONPs and FA-IONPs measured with the MTS test. The cell viabilities are the percentages obtained from the absorbance of cells treated with IONPs normalized with the absorbance of cells without IONPs (0  $\mu\text{g}_{\text{Fe}} \text{ml}^{-1}$ ).

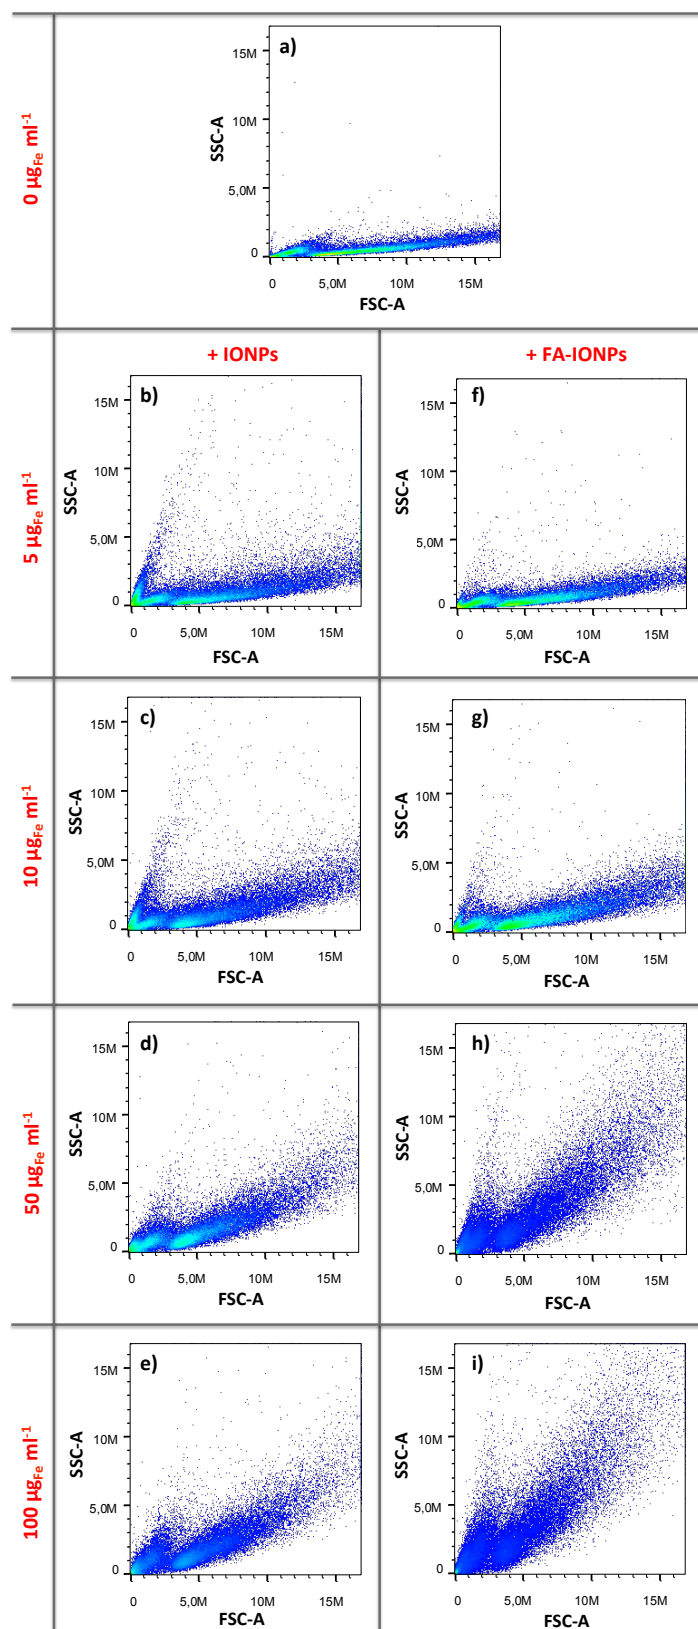

**Fig. S8:** Forward scatter (FSC) vs side scatter (SSC) plot of 22Rv.1 cells without IONPs (0  $\mu\text{g}_{\text{Fe}} \text{ ml}^{-1}$ ; a) or treated for 24 h with different concentrations (5, 10, 50 and 100  $\mu\text{g}_{\text{Fe}} \text{ ml}^{-1}$ ) of uncoated IONPs (b, c, d, e) and FA-IONPs (f, g, h, i). SSC-A and FSC-A = area of the side and forward light scatter pulse. Data from a selected experiment.

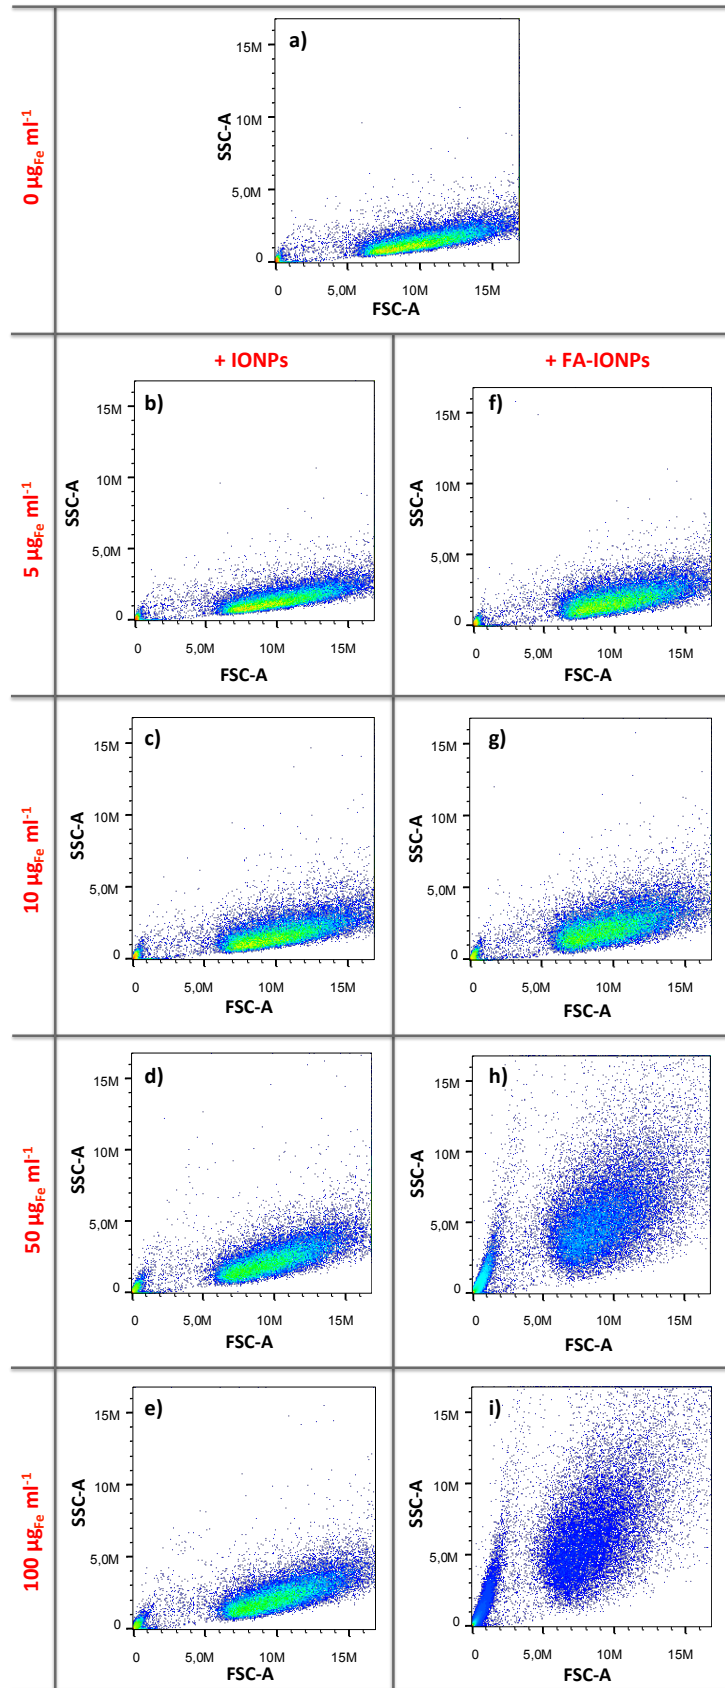

**Fig. S9:** Forward scatter (FSC) vs side scatter (SSC) plot of PC3 cells without IONPs ( $0 \mu\text{g}_{\text{Fe}} \text{ ml}^{-1}$ ; a) or treated for 24 h with different concentrations ( $5, 10, 50$  and  $100 \mu\text{g}_{\text{Fe}} \text{ ml}^{-1}$ ) of uncoated IONPs (b, c, d, e) and FA-IONPs (f, g, h, i). SSC-A and FSC-A = area of the side and forward light scatter pulse. Data from a selected experiment.



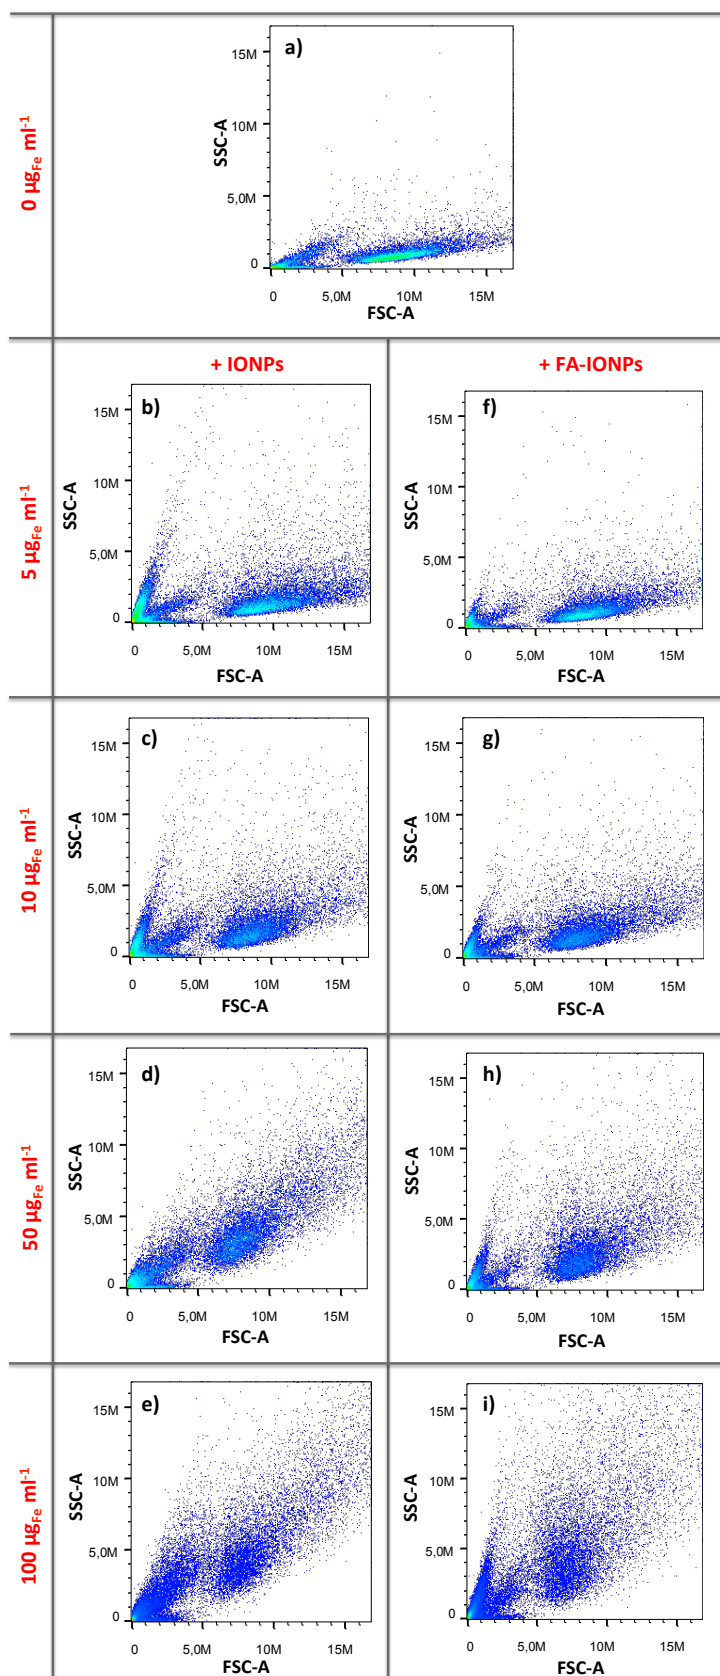

**Fig. S10:** Forward scatter (FSC) vs side scatter (SSC) plot of LnCaP cells without IONPs ( $0 \mu\text{gFe ml}^{-1}$ ; a) or treated for 24 h with different concentrations ( $5, 10, 50$  and  $100 \mu\text{gFe ml}^{-1}$ ) of uncoated IONPs (b, c, d, e) and FA-IONPs (f, g, h, i). SSC-A and FSC-A = area of the side and forward light scatter pulse. Data from a selected experiment.

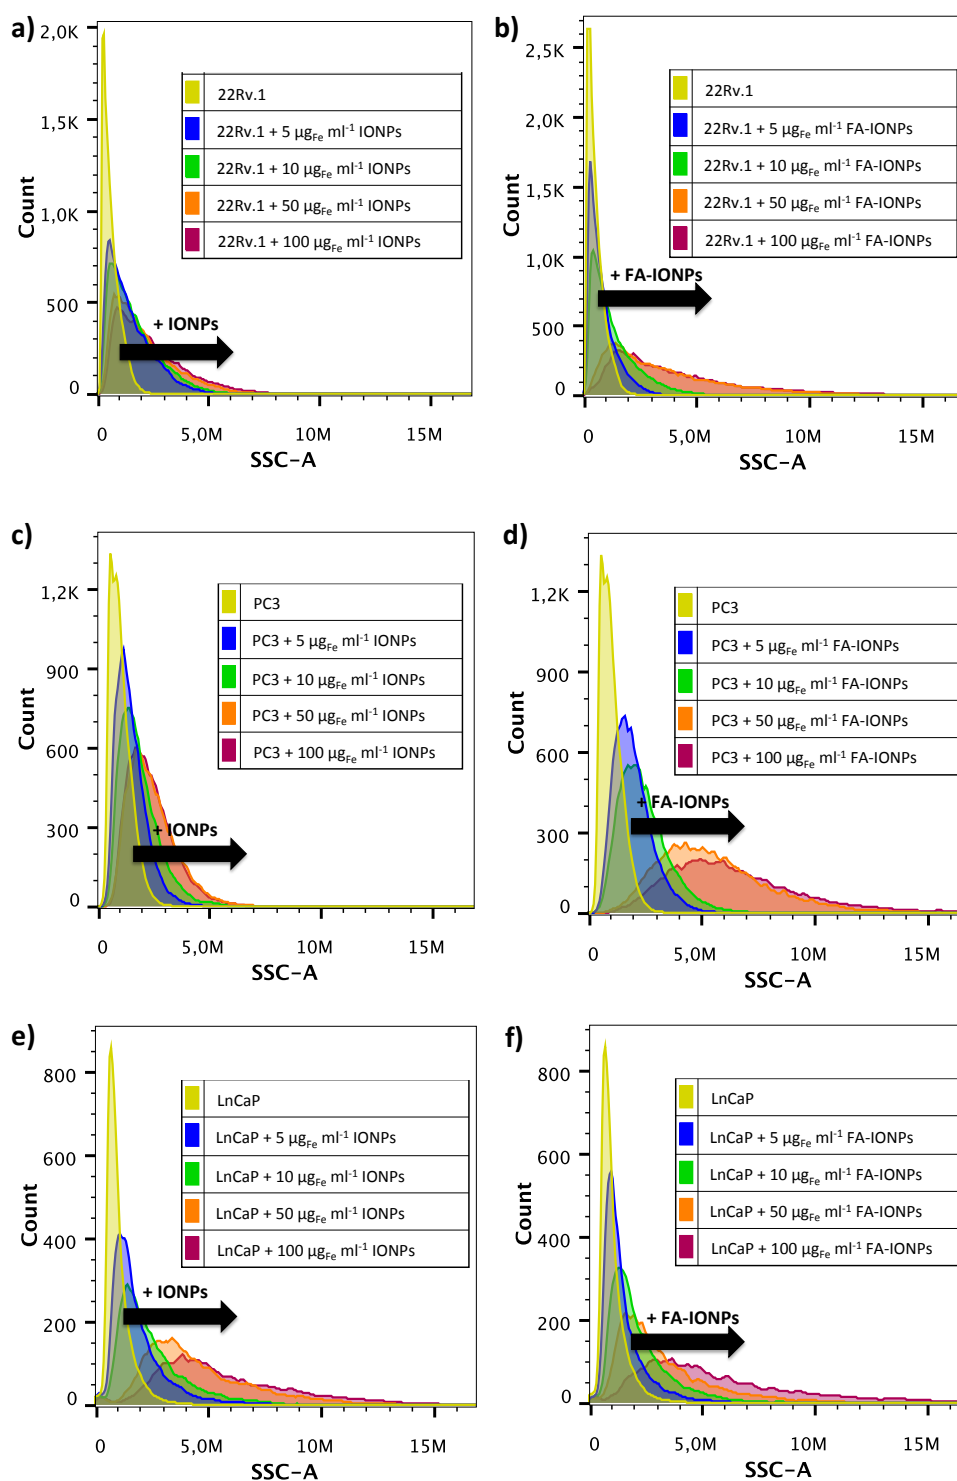

**Fig. S11:** Counts vs area of the side scatter (SSC-A) plot of 22Rv.1 (a, b), PC3 (c, d) and LnCaP cells (e, f) treated for 24 h with different concentrations (5, 10, 50 and 100  $\mu\text{g}_{\text{Fe}}$  ml $^{-1}$ ) of uncoated IONPs (a, c, e) and FA-IONPs (b, d, f). Data from experiments selected in Fig. S4, S5 and S6.

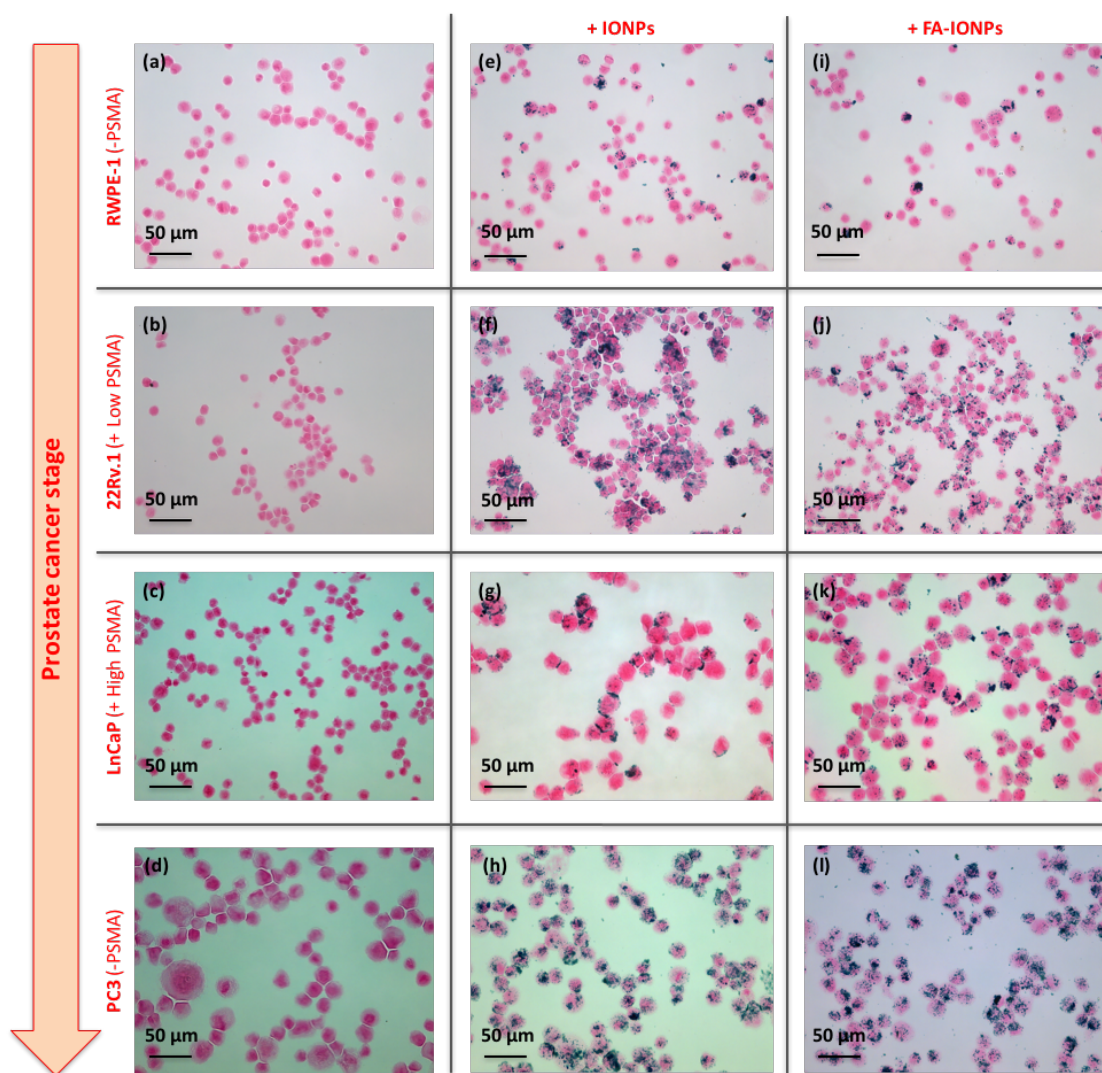

**Fig. S12:** Transmitted light microscopy micrograph of RWPE-1 (a, e, i), 22Rv.1 (b, f, j), LnCaP (c, g, k) and PC3 (d, h, l) without IONPs (a, b, c, d) or incubated for 24 h with  $10 \mu\text{g}_{\text{Fe}} \text{ml}^{-1}$  of uncoated IONPs (e, f, g, h) or FA-IONPs (i, j, k, l). Cells were stained with Nuclear Fast Red (light pink staining) and Prussian Blue (dark blue staining), highlighting the cellular cytoplasm and the iron, respectively.

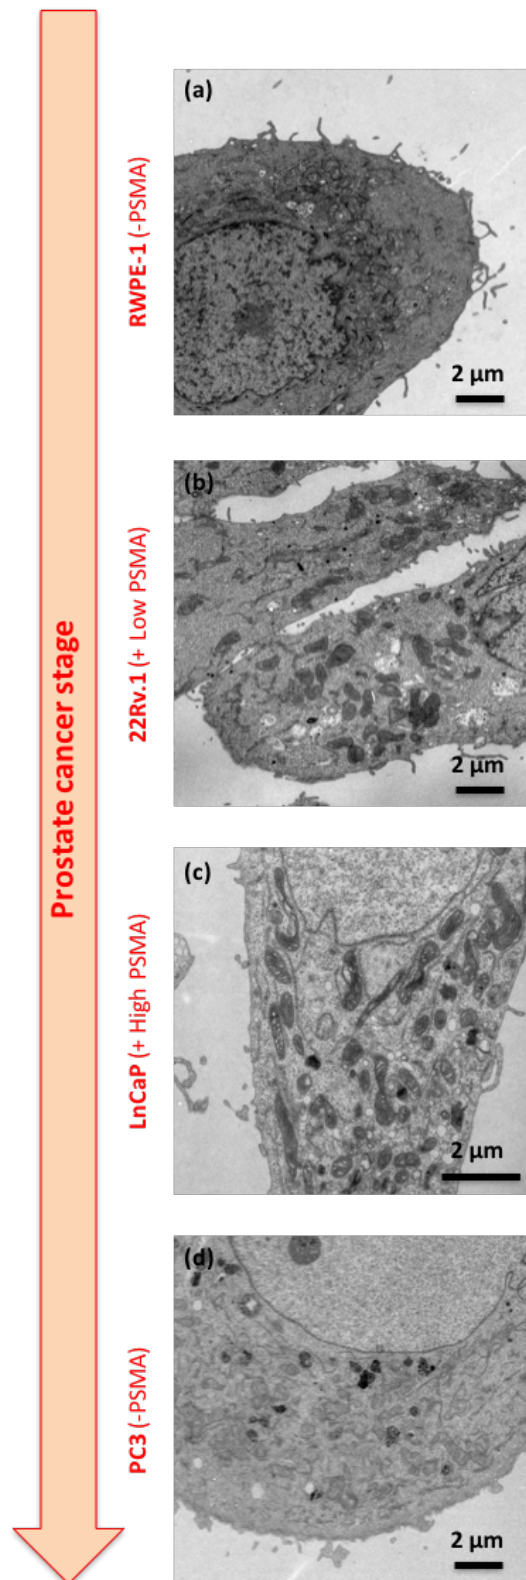

**Fig. S13:** TEM micrographs of 50 nm-thick sections of RWPE-1 (a), 22Rv.1 (b), LnCaP (c) and PC3 (d) cells. The presence and the absence of PSMA in each cell lines are indicated by +PSMA or –PSMA, respectively.

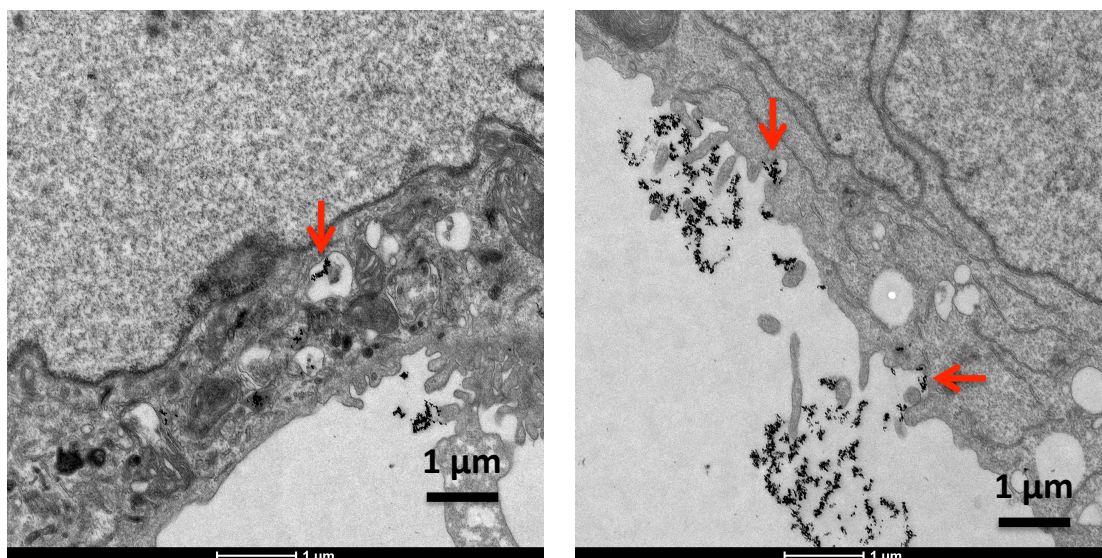

**Fig. S14:** TEM micrographs of 50 nm-thick sections of LnCaP cells incubated for 1 h with  $100 \mu\text{g}_{\text{Fe}} \text{ml}^{-1}$  FA-IONPs which show FA-IONPs already inside cells (left panel) and FA-IONPs within the engulfed cell membrane (right panel). Red arrows indicate FA-IONPs inside cells or inside cell membrane invaginations ready to be taken up.
